# Supplementary material
Source: PubMed Central journal article supplement (PMC7791063)

## Supplementary Materials

### Supplementary Table S1

Table S1. Primers used in the study

| Primer name      | Primer sequences (5'->3') |
|------------------|---------------------------|
| $\beta$ -actin-F | AGAGCTACGAGCTGCCTGAC      |
| $\beta$ -actin-R | AGCACTGTGTTGGCGTACAG      |
| LANA-F           | TTCCAGTTACCCACCCAAAA      |
| LANA-R           | TTGGATCTCGTCTTCCATCC      |
| RTA-F            | CACAAAAATGGCGCAAGATGA     |
| RTA-R            | TGGTAGAGTTGGGCCTTCAGTT    |
| ORF45-F          | GCTTTGCGGCTTAAGTTTGG      |
| ORF45-R          | CGCCTCCTCTGGTAGCGA        |
| PAN RNA-F        | CGACAAAGTGAGGTGGCATT      |
| PAN RNA-R        | CCGCACACCACTTTAGTCCAA     |
| vIL-6-F          | TAAAAAGCTCGCCGATGGCT      |
| vIL-6-R          | ACTGATTTTCCAACTCCGTCG     |
| ORF57-F          | AGGTCCCCCTCACCAGTAAA      |
| ORF57-R          | GAGGACGTGTGTTTTGACCG      |
| ORF59-F          | CGAGTCTTCGCAAAGGTT        |
| ORF59-R          | AAGGGACCAACTGGTGTGAG      |
| ORF65-F          | ATATGTCGCAGGCCGAATAC      |
| ORF65-R          | CCACCCATCCTCCTCAGATA      |
| K8.1-F           | AAAGCGTCCAGGCCACCACAGA    |
| K8.1-R           | GGCAGAAAATGGCACACGGTTAC   |
| vIRF3-F          | TGGTCTTCTCCGATGCTTCT      |
| vIRF3-R          | TCACCTACACAGTGGGTCATCAC   |
| K12-F            | TTCATGTCCCGGATGTGTTA      |
| K12-R            | TAATCGCCAACAGACAAACG      |
| vCyclin-F        | CATTGCCCGCCTCTATTATCA     |
| vCyclin-R        | ATGACGTTGGCAGGAACCA       |
| IRF7-F           | TGGTCCTGGTGAAGCTGGAA      |
| IRF7-R           | GATGTCGTCATAGAGGCTGTTGG   |
| ISG15-F          | ATGGGCTGGGACCTGACG        |
| ISG15-R          | GCCAATCTTCTGGGTGATCTG     |
| IFIT1-F          | GGAATACACAACCTACTAGCC     |
| IFIT1-R          | CCAGGTCACCAGACTCCTCA      |
| IFIT2-F          | GGGAACTATGCCTGGGTC        |
| IFIT2-R          | CCTTCGCTCTTTCAATTTGGTTTC  |
| IFIT3-F          | TGAGGAAGGGTGGACACAAGTAA   |
| IFIT3-R          | AGGAGAATTCTGGGTTGTTGGGCT  |
| p62-F            | ATCAGCTTCTGGTCCATCGG      |
| p62-R            | ATCGATATCAACTTCAATGCCAG   |

## **Supplementary Figure legends**

**Fig. S1 Cytotoxicity of KPT-8602 to HUVEC.** (A-D) HUVEC were treated with the indicated doses of KPT-8602 for 24, 48, 72 and 96 h. The cell viability was analyzed by MTT assay. \*, \*\*, and \*\*\* indicate P values of <0.05, <0.01, and <0.001, respectively; NS, not significant.

**Fig. S2 XPO1 inhibitor KPT-8602 treatment induces p62 nuclear retention.**

HUVEC were pre-treated with 0.5  $\mu$ M KPT-8602 or vehicle control DMSO for 1 h and then infected with KSHV for 12 h in the presence of KPT-8602 or DMSO. Cells were fixed and stained for p62. Nuclei were stained with DAPI. Images were taken with a confocal microscopy (magnification  $\times$ 600).

**Fig. S3 XPO1 knockdown induces p62 nuclear retention.** HUVEC with XPO1

knockdown were infected with KSHV for 12 h. Cells were fixed and stained for p62. Nuclei were stained with DAPI. Images were taken with a confocal microscopy (magnification  $\times$ 600).

Figure S1

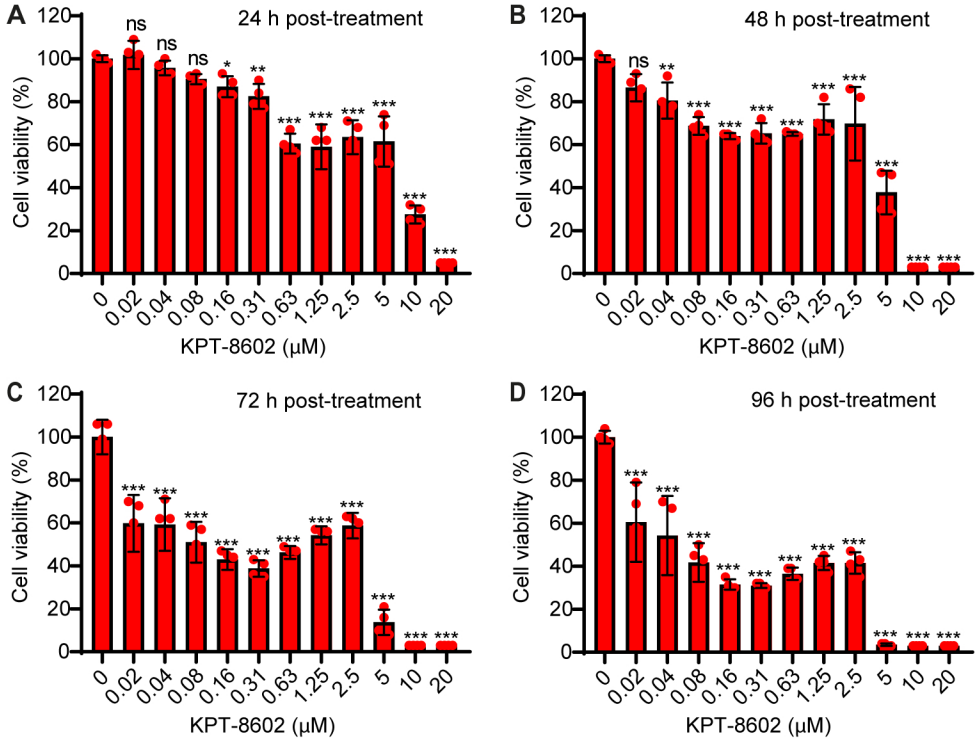

**Figure S2**

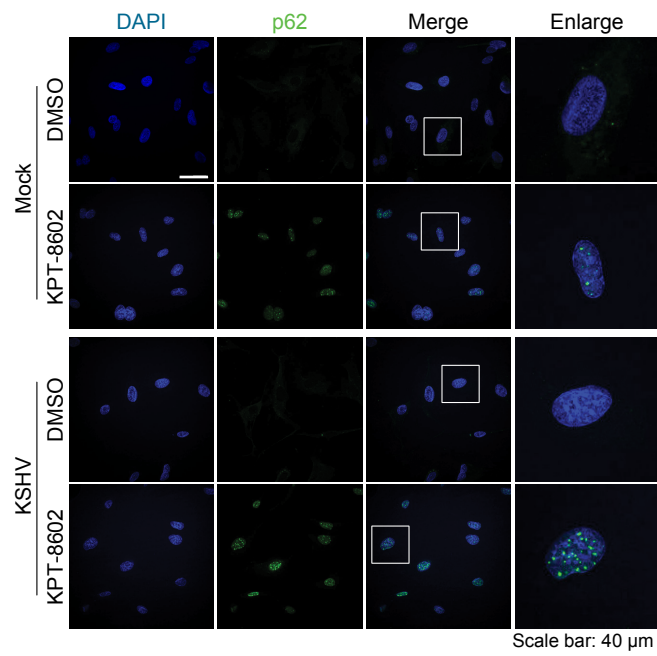

**Figure S3**

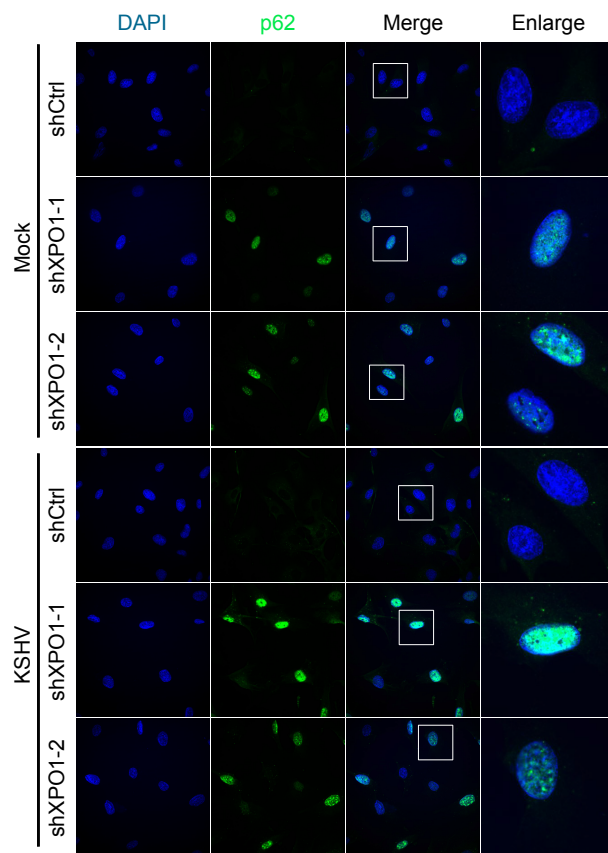

Supplement: 41419_2020_3303_MOESM1_ESM.pdf [file 41419_2020_3303_MOESM1_ESM.pdf]
